# Supplementary material
Source: publisher figshare collection journal article supplement (https://acs.figshare.com/ndownloader/files/3858736)
Supplement: Supplementary file 1 [file 3858736]

 
data_xx 
 
_audit_creation_method            SHELXL-97 
_chemical_name_systematic 
; 
 ? 
; 
_chemical_name_common             ? 
_chemical_melting_point           ? 
_chemical_formula_moiety          'Ca2 Co2 O5' 
_chemical_formula_sum 
 'Ca2 Co2 O5' 
_chemical_formula_weight          278.02 
 
loop_ 
 _atom_type_symbol 
 _atom_type_description 
 _atom_type_scat_dispersion_real 
 _atom_type_scat_dispersion_imag 
 _atom_type_scat_source 
 'O'  'O'   0.0106   0.0060 
 'International Tables Vol C Tables 4.2.6.8 and 6.1.1.4' 
 'Ca'  'Ca'   0.2262   0.3064 
 'International Tables Vol C Tables 4.2.6.8 and 6.1.1.4' 
 'Co'  'Co'   0.3494   0.9721 
 'International Tables Vol C Tables 4.2.6.8 and 6.1.1.4' 
 
_symmetry_cell_setting           'Orthorhombic'
_symmetry_space_group_name_H-M   'Pcmb ' 
 
loop_ 
 _symmetry_equiv_pos_as_xyz 
 'x, y, z' 
 '-x, y+1/2, -z' 
 '-x, -y+1/2, z+1/2' 
 'x, -y, -z+1/2' 
 '-x, -y, -z' 
 'x, -y-1/2, z' 
 'x, y-1/2, -z-1/2' 
 '-x, y, z-1/2' 
 
_cell_length_a                    5.28960(10) 
_cell_length_b                    14.9240(2) 
_cell_length_c                    10.9547(2) 
_cell_angle_alpha                 90.00 
_cell_angle_beta                  90.00 
_cell_angle_gamma                 90.00 
_cell_volume                      864.79(3) 
_cell_formula_units_Z             8 
_cell_measurement_temperature     300(2) 
_cell_measurement_reflns_used     4262
_cell_measurement_theta_min        2.73
_cell_measurement_theta_max       31.49 
 
_exptl_crystal_description        'block'
_exptl_crystal_colour             'black' 
_exptl_crystal_size_max           0.06 
_exptl_crystal_size_mid           0.05 
_exptl_crystal_size_min           0.05 
_exptl_crystal_density_meas       ? 
_exptl_crystal_density_diffrn     4.271 
_exptl_crystal_density_method     'not measured' 
_exptl_crystal_F_000              1072 
_exptl_absorpt_coefficient_mu     9.956 
_exptl_absorpt_correction_type    multi-scan 
_exptl_absorpt_correction_T_min   0.4144 
_exptl_absorpt_correction_T_max   0.4942 
_exptl_absorpt_process_details    'SADABS (Sheldrick, 2003)'  
 
_exptl_special_details 
; 
 ? 
; 
 
_diffrn_ambient_temperature       300(2) 
_diffrn_radiation_wavelength      0.71073 
_diffrn_radiation_type            MoK\a 
_diffrn_radiation_source          'fine-focus sealed tube' 
_diffrn_radiation_monochromator   graphite 
_diffrn_measurement_device_type   'Bruker APEX-II CCD'
_diffrn_measurement_method        '\f and \w scans'
_diffrn_detector_area_resol_mean  ?
_diffrn_standards_number          0
_diffrn_standards_interval_count  ?
_diffrn_standards_decay_%         ? 
_diffrn_reflns_number             11175 
_diffrn_reflns_av_R_equivalents   0.0359 
_diffrn_reflns_av_sigmaI/netI     0.0211 
_diffrn_reflns_limit_h_min        -7 
_diffrn_reflns_limit_h_max        7 
_diffrn_reflns_limit_k_min        -21 
_diffrn_reflns_limit_k_max        21 
_diffrn_reflns_limit_l_min        -16 
_diffrn_reflns_limit_l_max        15 
_diffrn_reflns_theta_min          2.73 
_diffrn_reflns_theta_max          31.54 
_reflns_number_total              1488 
_reflns_number_gt                 950 
_reflns_threshold_expression      >2sigma(I) 
 
_computing_data_collection       'Bruker APEX2'
_computing_cell_refinement       'Bruker SAINT'
_computing_data_reduction        'Bruker SAINT' 
_computing_structure_solution    'SHELXS-97 (Sheldrick, 2008)'
_computing_structure_refinement  'SHELXL-97 (Sheldrick, 2008)'
_computing_molecular_graphics    'Bruker SHELXTL'
_computing_publication_material  'Bruker SHELXTL' 
 
_refine_special_details 
; 
 Refinement of F^2^ against ALL reflections.  The weighted R-factor wR and 
 goodness of fit S are based on F^2^, conventional R-factors R are based 
 on F, with F set to zero for negative F^2^. The threshold expression of 
 F^2^ > 2sigma(F^2^) is used only for calculating R-factors(gt) etc. and is 
 not relevant to the choice of reflections for refinement.  R-factors based 
 on F^2^ are statistically about twice as large as those based on F, and R- 
 factors based on ALL data will be even larger. 
; 
 
_refine_ls_structure_factor_coef  Fsqd  
_refine_ls_matrix_type            full 
_refine_ls_weighting_scheme       calc  
_refine_ls_weighting_details 
 'calc w=1/[\s^2^(Fo^2^)+(0.0403P)^2^+0.0000P] where P=(Fo^2^+2Fc^2^)/3' 
_atom_sites_solution_primary      direct 
_atom_sites_solution_secondary    difmap 
_atom_sites_solution_hydrogens    ?
_refine_ls_hydrogen_treatment     ?
_refine_ls_extinction_method      SHELXL 
_refine_ls_extinction_coef        0.00197(19) 
_refine_ls_extinction_expression 
 'Fc^*^=kFc[1+0.001xFc^2^\l^3^/sin(2\q)]^-1/4^' 
_refine_ls_number_reflns          1488 
_refine_ls_number_parameters      91 
_refine_ls_number_restraints      0 
_refine_ls_R_factor_all           0.0374 
_refine_ls_R_factor_gt            0.0221 
_refine_ls_wR_factor_ref          0.0703 
_refine_ls_wR_factor_gt           0.0620 
_refine_ls_goodness_of_fit_ref    1.000 
_refine_ls_restrained_S_all       1.000 
_refine_ls_shift/su_max           0.001 
_refine_ls_shift/su_mean          0.000 
 
loop_ 
 _atom_site_label 
 _atom_site_type_symbol 
 _atom_site_fract_x 
 _atom_site_fract_y 
 _atom_site_fract_z 
 _atom_site_U_iso_or_equiv 
 _atom_site_adp_type 
 _atom_site_occupancy 
 _atom_site_symmetry_multiplicity 
 _atom_site_calc_flag 
 _atom_site_refinement_flags 
 _atom_site_disorder_assembly 
 _atom_site_disorder_group 
Ca1 Ca -0.01250(9) 0.10861(8) 0.75966(13) 0.0102(3) Uani 1 1 d . . . 
Ca2 Ca 0.49083(8) 0.39149(9) 0.49036(13) 0.0103(3) Uani 1 1 d . . . 
Co1 Co 0.45093(10) 0.2500 0.71997(7) 0.00871(14) Uani 1 2 d S . . 
Co2 Co -0.04581(10) 0.2500 0.52985(7) 0.00890(14) Uani 1 2 d S . . 
Co3 Co 0.0000 0.0000 0.5000 0.0072(3) Uani 1 2 d S . . 
Co4 Co -0.50473(7) 0.0000 0.7500 0.0069(3) Uani 1 2 d S . . 
O1 O 0.0896(4) 0.2500 0.6927(2) 0.0106(5) Uani 1 2 d S . . 
O2 O 0.5928(4) 0.2500 0.5576(2) 0.0107(5) Uani 1 2 d S . . 
O3 O 0.0190(3) 0.3602(3) 0.4704(5) 0.0133(8) Uani 1 1 d . . . 
O4 O 0.5088(3) 0.1396(3) 0.7796(5) 0.0152(9) Uani 1 1 d . . . 
O5 O -0.2440(4) -0.00991(11) 0.3742(5) 0.0106(3) Uani 1 1 d . . . 
O6 O -0.2566(4) 0.01402(11) 0.6241(5) 0.0099(3) Uani 1 1 d . . . 
 
loop_ 
 _atom_site_aniso_label 
 _atom_site_aniso_U_11 
 _atom_site_aniso_U_22 
 _atom_site_aniso_U_33 
 _atom_site_aniso_U_23 
 _atom_site_aniso_U_13 
 _atom_site_aniso_U_12 
Ca1 0.0124(3) 0.0081(6) 0.0102(7) -0.0004(4) 0.00006(16) -0.00050(15) 
Ca2 0.0122(3) 0.0084(6) 0.0102(7) 0.0000(4) -0.00067(15) 0.00074(14) 
Co1 0.0101(2) 0.0065(3) 0.0095(3) 0.000 0.0010(3) 0.000 
Co2 0.0098(2) 0.0073(3) 0.0096(3) 0.000 -0.0003(3) 0.000 
Co3 0.0060(3) 0.0097(7) 0.0058(8) -0.0003(5) -0.00019(12) 0.00012(12) 
Co4 0.0056(3) 0.0092(7) 0.0060(8) 0.0005(5) 0.000 0.000 
O1 0.0110(11) 0.0101(12) 0.0107(12) 0.000 -0.0026(9) 0.000 
O2 0.0120(12) 0.0091(11) 0.0109(12) 0.000 0.0015(9) 0.000 
O3 0.0184(10) 0.010(2) 0.0114(19) 0.0043(16) 0.0000(8) -0.0013(7) 
O4 0.0184(11) 0.012(2) 0.016(2) 0.0007(17) -0.0002(6) 0.0033(6) 
O5 0.0088(7) 0.0136(8) 0.0094(8) -0.0004(17) -0.0015(6) -0.0004(11) 
O6 0.0090(7) 0.0111(7) 0.0097(8) -0.0009(17) 0.0024(6) 0.0010(11) 
 
_geom_special_details 
; 
 All esds (except the esd in the dihedral angle between two l.s. planes) 
 are estimated using the full covariance matrix.  The cell esds are taken 
 into account individually in the estimation of esds in distances, angles 
 and torsion angles; correlations between esds in cell parameters are only 
 used when they are defined by crystal symmetry.  An approximate (isotropic) 
 treatment of cell esds is used for estimating esds involving l.s. planes. 
; 
 
loop_ 
 _geom_bond_atom_site_label_1 
 _geom_bond_atom_site_label_2 
 _geom_bond_distance 
 _geom_bond_site_symmetry_2 
 _geom_bond_publ_flag 
Ca1 O1 2.2983(16) . ? 
Ca1 O3 2.355(5) 3 ? 
Ca1 O6 2.422(4) . ? 
Ca1 O5 2.482(4) 5_556 ? 
Ca1 O5 2.558(3) 8_556 ? 
Ca1 O6 2.576(3) 4_556 ? 
Ca1 O4 2.5832(18) 1_455 ? 
Ca1 O4 2.8046(19) . ? 
Ca1 Co4 3.0688(8) . ? 
Ca1 Co3 3.0925(14) 4_556 ? 
Ca1 Co4 3.1389(8) 1_655 ? 
Ca1 Ca1 3.249(3) 4_556 ? 
Ca2 O2 2.3007(16) . ? 
Ca2 O4 2.355(6) 3_654 ? 
Ca2 O6 2.433(4) 6_665 ? 
Ca2 O5 2.464(4) 2_556 ? 
Ca2 O6 2.540(3) 2_556 ? 
Ca2 O3 2.548(2) . ? 
Ca2 O5 2.591(3) 6_665 ? 
Ca2 O3 2.841(2) 1_655 ? 
Ca2 Co3 3.0617(8) 2_556 ? 
Ca2 Co4 3.0920(14) 2_556 ? 
Ca2 Co3 3.1444(8) 2_656 ? 
Ca2 Ca2 3.247(3) 5_666 ? 
Co1 O4 1.799(5) . ? 
Co1 O4 1.799(5) 6_565 ? 
Co1 O2 1.930(3) . ? 
Co1 O1 1.934(2) . ? 
Co1 Ca1 3.2635(10) 6_565 ? 
Co1 Ca2 3.2910(14) 6_565 ? 
Co1 Ca1 3.5633(10) 6_665 ? 
Co1 Ca1 3.5633(10) 1_655 ? 
Co1 Ca2 3.6506(14) 8_656 ? 
Co1 Ca2 3.6506(14) 3_655 ? 
Co2 O3 1.801(4) . ? 
Co2 O3 1.801(4) 6_565 ? 
Co2 O1 1.923(3) . ? 
Co2 O2 1.936(2) 1_455 ? 
Co2 Ca2 3.2639(10) 6_465 ? 
Co2 Ca2 3.2639(10) 1_455 ? 
Co2 Ca1 3.2896(14) 6_565 ? 
Co2 Ca2 3.5642(10) 6_565 ? 
Co2 Ca1 3.6480(14) 8 ? 
Co2 Ca1 3.6480(14) 3_554 ? 
Co3 O5 1.894(4) . ? 
Co3 O5 1.894(4) 5_556 ? 
Co3 O6 1.932(4) . ? 
Co3 O6 1.932(4) 5_556 ? 
Co3 O3 2.114(4) 6_565 ? 
Co3 O3 2.114(4) 2_546 ? 
Co3 Ca2 3.0618(8) 6_565 ? 
Co3 Ca2 3.0618(8) 2_546 ? 
Co3 Ca1 3.0925(14) 4_556 ? 
Co3 Ca1 3.0925(14) 8 ? 
Co3 Ca2 3.1444(8) 6_465 ? 
Co3 Ca2 3.1444(8) 2_646 ? 
Co4 O5 1.907(4) 5_456 ? 
Co4 O5 1.907(4) 8_456 ? 
Co4 O6 1.916(4) . ? 
Co4 O6 1.916(4) 4_556 ? 
Co4 O4 2.110(4) 4_456 ? 
Co4 O4 2.110(4) 1_455 ? 
Co4 Ca1 3.0689(8) 4_556 ? 
Co4 Ca2 3.0920(14) 3 ? 
Co4 Ca2 3.0920(14) 2_546 ? 
Co4 Ca1 3.1389(8) 4_456 ? 
Co4 Ca1 3.1389(8) 1_455 ? 
O1 Ca1 2.2983(16) 6_565 ? 
O2 Co2 1.936(2) 1_655 ? 
O2 Ca2 2.3006(16) 6_565 ? 
O3 Co3 2.114(4) 2_556 ? 
O3 Ca1 2.355(5) 3_554 ? 
O3 Ca2 2.841(2) 1_455 ? 
O4 Co4 2.110(4) 1_655 ? 
O4 Ca2 2.355(6) 3_655 ? 
O4 Ca1 2.5832(18) 1_655 ? 
O5 Co4 1.907(4) 5_456 ? 
O5 Ca2 2.464(4) 2_546 ? 
O5 Ca1 2.482(4) 5_556 ? 
O5 Ca1 2.558(3) 8 ? 
O5 Ca2 2.591(3) 6_465 ? 
O6 Ca2 2.433(4) 6_465 ? 
O6 Ca2 2.540(3) 2_546 ? 
O6 Ca1 2.576(3) 4_556 ? 
 
loop_ 
 _geom_angle_atom_site_label_1 
 _geom_angle_atom_site_label_2 
 _geom_angle_atom_site_label_3 
 _geom_angle 
 _geom_angle_site_symmetry_1 
 _geom_angle_site_symmetry_3 
 _geom_angle_publ_flag 
O1 Ca1 O3 97.73(13) . 3 ? 
O1 Ca1 O6 117.69(12) . . ? 
O3 Ca1 O6 135.12(13) 3 . ? 
O1 Ca1 O5 103.17(10) . 5_556 ? 
O3 Ca1 O5 134.78(14) 3 5_556 ? 
O6 Ca1 O5 65.37(12) . 5_556 ? 
O1 Ca1 O5 131.81(8) . 8_556 ? 
O3 Ca1 O5 70.37(14) 3 8_556 ? 
O6 Ca1 O5 100.39(13) . 8_556 ? 
O5 Ca1 O5 65.8(2) 5_556 8_556 ? 
O1 Ca1 O6 158.08(9) . 4_556 ? 
O3 Ca1 O6 69.44(14) 3 4_556 ? 
O6 Ca1 O6 67.8(2) . 4_556 ? 
O5 Ca1 O6 98.30(13) 5_556 4_556 ? 
O5 Ca1 O6 62.11(10) 8_556 4_556 ? 
O1 Ca1 O4 95.34(12) . 1_455 ? 
O3 Ca1 O4 82.37(13) 3 1_455 ? 
O6 Ca1 O4 68.51(13) . 1_455 ? 
O5 Ca1 O4 133.80(14) 5_556 1_455 ? 
O5 Ca1 O4 127.02(14) 8_556 1_455 ? 
O6 Ca1 O4 66.05(12) 4_556 1_455 ? 
O1 Ca1 O4 69.05(11) . . ? 
O3 Ca1 O4 84.57(12) 3 . ? 
O6 Ca1 O4 131.92(13) . . ? 
O5 Ca1 O4 66.82(12) 5_556 . ? 
O5 Ca1 O4 63.53(11) 8_556 . ? 
O6 Ca1 O4 124.84(13) 4_556 . ? 
O4 Ca1 O4 158.1(2) 1_455 . ? 
O1 Ca1 Co4 132.32(7) . . ? 
O3 Ca1 Co4 97.23(7) 3 . ? 
O6 Ca1 Co4 38.62(9) . . ? 
O5 Ca1 Co4 97.47(6) 5_556 . ? 
O5 Ca1 Co4 95.84(6) 8_556 . ? 
O6 Ca1 Co4 38.44(8) 4_556 . ? 
O4 Ca1 Co4 42.76(10) 1_455 . ? 
O4 Ca1 Co4 157.51(10) . . ? 
O1 Ca1 Co3 138.41(8) . 4_556 ? 
O3 Ca1 Co3 43.08(11) 3 4_556 ? 
O6 Ca1 Co3 103.18(10) . 4_556 ? 
O5 Ca1 Co3 100.38(10) 5_556 4_556 ? 
O5 Ca1 Co3 37.70(9) 8_556 4_556 ? 
O6 Ca1 Co3 38.52(9) 4_556 4_556 ? 
O4 Ca1 Co3 92.44(12) 1_455 4_556 ? 
O4 Ca1 Co3 89.94(11) . 4_556 ? 
Co4 Ca1 Co3 76.74(3) . 4_556 ? 
O1 Ca1 Co4 105.20(6) . 1_655 ? 
O3 Ca1 Co4 98.50(7) 3 1_655 ? 
O6 Ca1 Co4 97.73(6) . 1_655 ? 
O5 Ca1 Co4 37.42(9) 5_556 1_655 ? 
O5 Ca1 Co4 37.40(9) 8_556 1_655 ? 
O6 Ca1 Co4 94.51(6) 4_556 1_655 ? 
O4 Ca1 Co4 159.07(11) 1_455 1_655 ? 
O4 Ca1 Co4 41.10(9) . 1_655 ? 
Co4 Ca1 Co4 116.88(4) . 1_655 ? 
Co3 Ca1 Co4 74.91(2) 4_556 1_655 ? 
O1 Ca1 Ca1 153.56(9) . 4_556 ? 
O3 Ca1 Ca1 105.15(12) 3 4_556 ? 
O6 Ca1 Ca1 51.57(7) . 4_556 ? 
O5 Ca1 Ca1 50.90(7) 5_556 4_556 ? 
O5 Ca1 Ca1 48.84(7) 8_556 4_556 ? 
O6 Ca1 Ca1 47.42(8) 4_556 4_556 ? 
O4 Ca1 Ca1 100.61(10) 1_455 4_556 ? 
O4 Ca1 Ca1 99.76(9) . 4_556 ? 
Co4 Ca1 Ca1 58.04(2) . 4_556 ? 
Co3 Ca1 Ca1 62.12(4) 4_556 4_556 ? 
Co4 Ca1 Ca1 58.84(2) 1_655 4_556 ? 
O2 Ca2 O4 97.64(13) . 3_654 ? 
O2 Ca2 O6 102.14(10) . 6_665 ? 
O4 Ca2 O6 134.75(14) 3_654 6_665 ? 
O2 Ca2 O5 118.64(12) . 2_556 ? 
O4 Ca2 O5 135.12(13) 3_654 2_556 ? 
O6 Ca2 O5 65.31(12) 6_665 2_556 ? 
O2 Ca2 O6 158.95(9) . 2_556 ? 
O4 Ca2 O6 70.02(14) 3_654 2_556 ? 
O6 Ca2 O6 98.51(13) 6_665 2_556 ? 
O5 Ca2 O6 67.0(2) 2_556 2_556 ? 
O2 Ca2 O3 95.09(12) . . ? 
O4 Ca2 O3 83.14(12) 3_654 . ? 
O6 Ca2 O3 134.09(14) 6_665 . ? 
O5 Ca2 O3 69.05(12) 2_556 . ? 
O6 Ca2 O3 67.17(11) 2_556 . ? 
O2 Ca2 O5 131.04(8) . 6_665 ? 
O4 Ca2 O5 69.65(14) 3_654 6_665 ? 
O6 Ca2 O5 66.6(2) 6_665 6_665 ? 
O5 Ca2 O5 100.10(12) 2_556 6_665 ? 
O6 Ca2 O5 61.99(10) 2_556 6_665 ? 
O3 Ca2 O5 127.82(13) . 6_665 ? 
O2 Ca2 O3 69.09(10) . 1_655 ? 
O4 Ca2 O3 83.76(11) 3_654 1_655 ? 
O6 Ca2 O3 66.53(11) 6_665 1_655 ? 
O5 Ca2 O3 131.73(13) 2_556 1_655 ? 
O6 Ca2 O3 124.07(12) 2_556 1_655 ? 
O3 Ca2 O3 157.8(2) . 1_655 ? 
O5 Ca2 O3 62.74(10) 6_665 1_655 ? 
O2 Ca2 Co3 132.32(7) . 2_556 ? 
O4 Ca2 Co3 97.97(7) 3_654 2_556 ? 
O6 Ca2 Co3 97.95(6) 6_665 2_556 ? 
O5 Ca2 Co3 38.20(9) 2_556 2_556 ? 
O6 Ca2 Co3 38.97(8) 2_556 2_556 ? 
O3 Ca2 Co3 43.08(9) . 2_556 ? 
O5 Ca2 Co3 96.62(6) 6_665 2_556 ? 
O3 Ca2 Co3 157.45(9) 1_655 2_556 ? 
O2 Ca2 Co4 138.41(8) . 2_556 ? 
O4 Ca2 Co4 42.97(11) 3_654 2_556 ? 
O6 Ca2 Co4 101.31(10) 6_665 2_556 ? 
O5 Ca2 Co4 102.28(10) 2_556 2_556 ? 
O6 Ca2 Co4 38.20(9) 2_556 2_556 ? 
O3 Ca2 Co4 92.65(11) . 2_556 ? 
O5 Ca2 Co4 37.95(9) 6_665 2_556 ? 
O3 Ca2 Co4 89.84(10) 1_655 2_556 ? 
Co3 Ca2 Co4 76.85(3) 2_556 2_556 ? 
O2 Ca2 Co3 105.14(6) . 2_656 ? 
O4 Ca2 Co3 97.68(7) 3_654 2_656 ? 
O6 Ca2 Co3 37.90(9) 6_665 2_656 ? 
O5 Ca2 Co3 97.24(6) 2_556 2_656 ? 
O6 Ca2 Co3 93.65(6) 2_556 2_656 ? 
O3 Ca2 Co3 159.42(10) . 2_656 ? 
O5 Ca2 Co3 37.00(9) 6_665 2_656 ? 
O3 Ca2 Co3 40.98(8) 1_655 2_656 ? 
Co3 Ca2 Co3 116.92(4) 2_556 2_656 ? 
Co4 Ca2 Co3 74.84(3) 2_556 2_656 ? 
O2 Ca2 Ca2 152.58(9) . 5_666 ? 
O4 Ca2 Ca2 105.09(13) 3_654 5_666 ? 
O6 Ca2 Ca2 50.68(7) 6_665 5_666 ? 
O5 Ca2 Ca2 51.76(7) 2_556 5_666 ? 
O6 Ca2 Ca2 47.82(8) 2_556 5_666 ? 
O3 Ca2 Ca2 102.58(10) . 5_666 ? 
O5 Ca2 Ca2 48.34(7) 6_665 5_666 ? 
O3 Ca2 Ca2 98.04(9) 1_655 5_666 ? 
Co3 Ca2 Ca2 59.70(2) 2_556 5_666 ? 
Co4 Ca2 Ca2 62.12(4) 2_556 5_666 ? 
Co3 Ca2 Ca2 57.22(2) 2_656 5_666 ? 
O4 Co1 O4 132.7(3) . 6_565 ? 
O4 Co1 O2 105.58(17) . . ? 
O4 Co1 O2 105.58(17) 6_565 . ? 
O4 Co1 O1 102.96(7) . . ? 
O4 Co1 O1 102.96(7) 6_565 . ? 
O2 Co1 O1 103.99(12) . . ? 
O4 Co1 Ca1 132.20(11) . 6_565 ? 
O4 Co1 Ca1 59.15(6) 6_565 6_565 ? 
O2 Co1 Ca1 114.50(6) . 6_565 ? 
O1 Co1 Ca1 43.82(3) . 6_565 ? 
O4 Co1 Ca1 59.15(7) . . ? 
O4 Co1 Ca1 132.20(11) 6_565 . ? 
O2 Co1 Ca1 114.50(6) . . ? 
O1 Co1 Ca1 43.82(3) . . ? 
Ca1 Co1 Ca1 80.57(4) 6_565 . ? 
O4 Co1 Ca2 71.28(18) . 6_565 ? 
O4 Co1 Ca2 148.71(18) 6_565 6_565 ? 
O2 Co1 Ca2 43.19(3) . 6_565 ? 
O1 Co1 Ca2 86.87(6) . 6_565 ? 
Ca1 Co1 Ca2 124.39(4) 6_565 6_565 ? 
Ca1 Co1 Ca2 74.640(18) . 6_565 ? 
O4 Co1 Ca2 148.71(18) . . ? 
O4 Co1 Ca2 71.28(18) 6_565 . ? 
O2 Co1 Ca2 43.19(3) . . ? 
O1 Co1 Ca2 86.87(6) . . ? 
Ca1 Co1 Ca2 74.640(18) 6_565 . ? 
Ca1 Co1 Ca2 124.39(4) . . ? 
Ca2 Co1 Ca2 79.83(5) 6_565 . ? 
O4 Co1 Ca1 111.26(9) . 6_665 ? 
O4 Co1 Ca1 43.75(7) 6_565 6_665 ? 
O2 Co1 Ca1 78.62(6) . 6_665 ? 
O1 Co1 Ca1 143.688(18) . 6_665 ? 
Ca1 Co1 Ca1 101.49(3) 6_565 6_665 ? 
Ca1 Co1 Ca1 164.78(5) . 6_665 ? 
Ca2 Co1 Ca1 114.97(3) 6_565 6_665 ? 
Ca2 Co1 Ca1 70.257(17) . 6_665 ? 
O4 Co1 Ca1 43.75(7) . 1_655 ? 
O4 Co1 Ca1 111.26(9) 6_565 1_655 ? 
O2 Co1 Ca1 78.62(6) . 1_655 ? 
O1 Co1 Ca1 143.688(18) . 1_655 ? 
Ca1 Co1 Ca1 164.78(5) 6_565 1_655 ? 
Ca1 Co1 Ca1 101.49(3) . 1_655 ? 
Ca2 Co1 Ca1 70.258(17) 6_565 1_655 ? 
Ca2 Co1 Ca1 114.97(3) . 1_655 ? 
Ca1 Co1 Ca1 72.62(3) 6_665 1_655 ? 
O4 Co1 Ca2 102.75(19) . 8_656 ? 
O4 Co1 Ca2 32.97(18) 6_565 8_656 ? 
O2 Co1 Ca2 135.62(5) . 8_656 ? 
O1 Co1 Ca2 102.04(7) . 8_656 ? 
Ca1 Co1 Ca2 65.25(2) 6_565 8_656 ? 
Ca1 Co1 Ca2 109.23(4) . 8_656 ? 
Ca2 Co1 Ca2 170.36(2) 6_565 8_656 ? 
Ca2 Co1 Ca2 104.10(3) . 8_656 ? 
Ca1 Co1 Ca2 59.421(18) 6_665 8_656 ? 
Ca1 Co1 Ca2 100.16(3) 1_655 8_656 ? 
O4 Co1 Ca2 32.97(18) . 3_655 ? 
O4 Co1 Ca2 102.75(19) 6_565 3_655 ? 
O2 Co1 Ca2 135.62(4) . 3_655 ? 
O1 Co1 Ca2 102.04(7) . 3_655 ? 
Ca1 Co1 Ca2 109.23(4) 6_565 3_655 ? 
Ca1 Co1 Ca2 65.25(2) . 3_655 ? 
Ca2 Co1 Ca2 104.10(3) 6_565 3_655 ? 
Ca2 Co1 Ca2 170.36(2) . 3_655 ? 
Ca1 Co1 Ca2 100.16(3) 6_665 3_655 ? 
Ca1 Co1 Ca2 59.421(18) 1_655 3_655 ? 
Ca2 Co1 Ca2 70.68(4) 8_656 3_655 ? 
O3 Co2 O3 131.8(3) . 6_565 ? 
O3 Co2 O1 105.34(16) . . ? 
O3 Co2 O1 105.34(16) 6_565 . ? 
O3 Co2 O2 104.18(7) . 1_455 ? 
O3 Co2 O2 104.18(7) 6_565 1_455 ? 
O1 Co2 O2 102.83(12) . 1_455 ? 
O3 Co2 Ca2 133.28(11) . 6_465 ? 
O3 Co2 Ca2 60.30(7) 6_565 6_465 ? 
O1 Co2 Ca2 113.75(6) . 6_465 ? 
O2 Co2 Ca2 43.88(3) 1_455 6_465 ? 
O3 Co2 Ca2 60.30(7) . 1_455 ? 
O3 Co2 Ca2 133.28(11) 6_565 1_455 ? 
O1 Co2 Ca2 113.75(6) . 1_455 ? 
O2 Co2 Ca2 43.88(3) 1_455 1_455 ? 
Ca2 Co2 Ca2 80.62(4) 6_465 1_455 ? 
O3 Co2 Ca1 71.40(17) . 6_565 ? 
O3 Co2 Ca1 148.43(16) 6_565 6_565 ? 
O1 Co2 Ca1 43.10(3) . 6_565 ? 
O2 Co2 Ca1 86.13(6) 1_455 6_565 ? 
Ca2 Co2 Ca1 123.82(4) 6_465 6_565 ? 
Ca2 Co2 Ca1 74.138(18) 1_455 6_565 ? 
O3 Co2 Ca1 148.43(16) . . ? 
O3 Co2 Ca1 71.40(17) 6_565 . ? 
O1 Co2 Ca1 43.10(3) . . ? 
O2 Co2 Ca1 86.13(6) 1_455 . ? 
Ca2 Co2 Ca1 74.137(18) 6_465 . ? 
Ca2 Co2 Ca1 123.82(4) 1_455 . ? 
Ca1 Co2 Ca1 79.80(5) 6_565 . ? 
O3 Co2 Ca2 110.19(9) . 6_565 ? 
O3 Co2 Ca2 42.59(7) 6_565 6_565 ? 
O1 Co2 Ca2 79.39(6) . 6_565 ? 
O2 Co2 Ca2 143.668(18) 1_455 6_565 ? 
Ca2 Co2 Ca2 101.46(3) 6_465 6_565 ? 
Ca2 Co2 Ca2 164.85(5) 1_455 6_565 ? 
Ca1 Co2 Ca2 115.48(3) 6_565 6_565 ? 
Ca1 Co2 Ca2 70.744(17) . 6_565 ? 
O3 Co2 Ca2 42.59(7) . . ? 
O3 Co2 Ca2 110.19(9) 6_565 . ? 
O1 Co2 Ca2 79.39(6) . . ? 
O2 Co2 Ca2 143.667(18) 1_455 . ? 
Ca2 Co2 Ca2 164.85(5) 6_465 . ? 
Ca2 Co2 Ca2 101.46(3) 1_455 . ? 
Ca1 Co2 Ca2 70.743(17) 6_565 . ? 
Ca1 Co2 Ca2 115.48(3) . . ? 
Ca2 Co2 Ca2 72.66(4) 6_565 . ? 
O3 Co2 Ca1 102.62(17) . 8 ? 
O3 Co2 Ca1 33.13(17) 6_565 8 ? 
O1 Co2 Ca1 136.17(4) . 8 ? 
O2 Co2 Ca1 102.19(7) 1_455 8 ? 
Ca2 Co2 Ca1 65.28(2) 6_465 8 ? 
Ca2 Co2 Ca1 109.28(4) 1_455 8 ? 
Ca1 Co2 Ca1 170.90(2) 6_565 8 ? 
Ca1 Co2 Ca1 104.20(3) . 8 ? 
Ca2 Co2 Ca1 59.437(18) 6_565 8 ? 
Ca2 Co2 Ca1 100.19(3) . 8 ? 
O3 Co2 Ca1 33.13(17) . 3_554 ? 
O3 Co2 Ca1 102.62(17) 6_565 3_554 ? 
O1 Co2 Ca1 136.17(5) . 3_554 ? 
O2 Co2 Ca1 102.19(7) 1_455 3_554 ? 
Ca2 Co2 Ca1 109.28(4) 6_465 3_554 ? 
Ca2 Co2 Ca1 65.28(2) 1_455 3_554 ? 
Ca1 Co2 Ca1 104.20(3) 6_565 3_554 ? 
Ca1 Co2 Ca1 170.90(2) . 3_554 ? 
Ca2 Co2 Ca1 100.19(3) 6_565 3_554 ? 
Ca2 Co2 Ca1 59.437(18) . 3_554 ? 
Ca1 Co2 Ca1 70.68(4) 8 3_554 ? 
O5 Co3 O5 179.999(1) . 5_556 ? 
O5 Co3 O6 92.4(2) . . ? 
O5 Co3 O6 87.6(2) 5_556 . ? 
O5 Co3 O6 87.6(2) . 5_556 ? 
O5 Co3 O6 92.4(2) 5_556 5_556 ? 
O6 Co3 O6 180.0 . 5_556 ? 
O5 Co3 O3 89.88(12) . 6_565 ? 
O5 Co3 O3 90.12(12) 5_556 6_565 ? 
O6 Co3 O3 91.97(12) . 6_565 ? 
O6 Co3 O3 88.03(12) 5_556 6_565 ? 
O5 Co3 O3 90.12(12) . 2_546 ? 
O5 Co3 O3 89.88(12) 5_556 2_546 ? 
O6 Co3 O3 88.03(12) . 2_546 ? 
O6 Co3 O3 91.97(12) 5_556 2_546 ? 
O3 Co3 O3 180.0 6_565 2_546 ? 
O5 Co3 Ca2 126.44(10) . 6_565 ? 
O5 Co3 Ca2 53.56(10) 5_556 6_565 ? 
O6 Co3 Ca2 124.23(9) . 6_565 ? 
O6 Co3 Ca2 55.77(9) 5_556 6_565 ? 
O3 Co3 Ca2 55.41(5) 6_565 6_565 ? 
O3 Co3 Ca2 124.59(5) 2_546 6_565 ? 
O5 Co3 Ca2 53.56(10) . 2_546 ? 
O5 Co3 Ca2 126.44(10) 5_556 2_546 ? 
O6 Co3 Ca2 55.77(9) . 2_546 ? 
O6 Co3 Ca2 124.23(9) 5_556 2_546 ? 
O3 Co3 Ca2 124.59(5) 6_565 2_546 ? 
O3 Co3 Ca2 55.41(5) 2_546 2_546 ? 
Ca2 Co3 Ca2 180.00(4) 6_565 2_546 ? 
O5 Co3 Ca1 124.34(10) . 4_556 ? 
O5 Co3 Ca1 55.66(10) 5_556 4_556 ? 
O6 Co3 Ca1 56.14(10) . 4_556 ? 
O6 Co3 Ca1 123.86(10) 5_556 4_556 ? 
O3 Co3 Ca1 130.46(14) 6_565 4_556 ? 
O3 Co3 Ca1 49.54(14) 2_546 4_556 ? 
Ca2 Co3 Ca1 108.95(2) 6_565 4_556 ? 
Ca2 Co3 Ca1 71.05(2) 2_546 4_556 ? 
O5 Co3 Ca1 55.66(10) . 8 ? 
O5 Co3 Ca1 124.34(10) 5_556 8 ? 
O6 Co3 Ca1 123.86(10) . 8 ? 
O6 Co3 Ca1 56.14(10) 5_556 8 ? 
O3 Co3 Ca1 49.54(14) 6_565 8 ? 
O3 Co3 Ca1 130.46(14) 2_546 8 ? 
Ca2 Co3 Ca1 71.05(2) 6_565 8 ? 
Ca2 Co3 Ca1 108.95(2) 2_546 8 ? 
Ca1 Co3 Ca1 180.0 4_556 8 ? 
O5 Co3 Ca2 55.40(9) . 6_465 ? 
O5 Co3 Ca2 124.60(9) 5_556 6_465 ? 
O6 Co3 Ca2 50.67(11) . 6_465 ? 
O6 Co3 Ca2 129.33(11) 5_556 6_465 ? 
O3 Co3 Ca2 61.79(5) 6_565 6_465 ? 
O3 Co3 Ca2 118.21(5) 2_546 6_465 ? 
Ca2 Co3 Ca2 116.92(4) 6_565 6_465 ? 
Ca2 Co3 Ca2 63.08(4) 2_546 6_465 ? 
Ca1 Co3 Ca2 106.27(2) 4_556 6_465 ? 
Ca1 Co3 Ca2 73.73(2) 8 6_465 ? 
O5 Co3 Ca2 124.60(9) . 2_646 ? 
O5 Co3 Ca2 55.40(9) 5_556 2_646 ? 
O6 Co3 Ca2 129.33(11) . 2_646 ? 
O6 Co3 Ca2 50.67(11) 5_556 2_646 ? 
O3 Co3 Ca2 118.21(5) 6_565 2_646 ? 
O3 Co3 Ca2 61.79(5) 2_546 2_646 ? 
Ca2 Co3 Ca2 63.08(4) 6_565 2_646 ? 
Ca2 Co3 Ca2 116.92(4) 2_546 2_646 ? 
Ca1 Co3 Ca2 73.73(2) 4_556 2_646 ? 
Ca1 Co3 Ca2 106.27(2) 8 2_646 ? 
Ca2 Co3 Ca2 180.0 6_465 2_646 ? 
O5 Co4 O5 91.7(2) 5_456 8_456 ? 
O5 Co4 O6 87.5(2) 5_456 . ? 
O5 Co4 O6 178.03(6) 8_456 . ? 
O5 Co4 O6 178.03(6) 5_456 4_556 ? 
O5 Co4 O6 87.5(2) 8_456 4_556 ? 
O6 Co4 O6 93.5(2) . 4_556 ? 
O5 Co4 O4 89.46(13) 5_456 4_456 ? 
O5 Co4 O4 93.26(13) 8_456 4_456 ? 
O6 Co4 O4 88.50(13) . 4_456 ? 
O6 Co4 O4 88.83(13) 4_556 4_456 ? 
O5 Co4 O4 93.26(13) 5_456 1_455 ? 
O5 Co4 O4 89.46(13) 8_456 1_455 ? 
O6 Co4 O4 88.83(13) . 1_455 ? 
O6 Co4 O4 88.50(13) 4_556 1_455 ? 
O4 Co4 O4 176.11(9) 4_456 1_455 ? 
O5 Co4 Ca1 125.08(9) 5_456 . ? 
O5 Co4 Ca1 127.41(10) 8_456 . ? 
O6 Co4 Ca1 52.10(11) . . ? 
O6 Co4 Ca1 56.73(9) 4_556 . ? 
O4 Co4 Ca1 119.87(5) 4_456 . ? 
O4 Co4 Ca1 56.24(5) 1_455 . ? 
O5 Co4 Ca1 127.41(10) 5_456 4_556 ? 
O5 Co4 Ca1 125.08(9) 8_456 4_556 ? 
O6 Co4 Ca1 56.73(9) . 4_556 ? 
O6 Co4 Ca1 52.10(11) 4_556 4_556 ? 
O4 Co4 Ca1 56.24(5) 4_456 4_556 ? 
O4 Co4 Ca1 119.87(5) 1_455 4_556 ? 
Ca1 Co4 Ca1 63.92(4) . 4_556 ? 
O5 Co4 Ca2 125.67(10) 5_456 3 ? 
O5 Co4 Ca2 56.63(10) 8_456 3 ? 
O6 Co4 Ca2 122.66(10) . 3 ? 
O6 Co4 Ca2 55.10(9) 4_556 3 ? 
O4 Co4 Ca2 130.35(16) 4_456 3 ? 
O4 Co4 Ca2 49.53(16) 1_455 3 ? 
Ca1 Co4 Ca2 70.96(2) . 3 ? 
Ca1 Co4 Ca2 106.61(2) 4_556 3 ? 
O5 Co4 Ca2 56.63(10) 5_456 2_546 ? 
O5 Co4 Ca2 125.67(10) 8_456 2_546 ? 
O6 Co4 Ca2 55.09(9) . 2_546 ? 
O6 Co4 Ca2 122.66(10) 4_556 2_546 ? 
O4 Co4 Ca2 49.53(16) 4_456 2_546 ? 
O4 Co4 Ca2 130.35(16) 1_455 2_546 ? 
Ca1 Co4 Ca2 106.61(2) . 2_546 ? 
Ca1 Co4 Ca2 70.96(2) 4_556 2_546 ? 
Ca2 Co4 Ca2 177.27(2) 3 2_546 ? 
O5 Co4 Ca1 54.54(9) 5_456 4_456 ? 
O5 Co4 Ca1 52.25(11) 8_456 4_456 ? 
O6 Co4 Ca1 128.21(11) . 4_456 ? 
O6 Co4 Ca1 123.66(9) 4_556 4_456 ? 
O4 Co4 Ca1 60.92(5) 4_456 4_456 ? 
O4 Co4 Ca1 122.97(5) 1_455 4_456 ? 
Ca1 Co4 Ca1 179.206(11) . 4_456 ? 
Ca1 Co4 Ca1 116.88(4) 4_556 4_456 ? 
Ca2 Co4 Ca1 108.63(2) 3 4_456 ? 
Ca2 Co4 Ca1 73.81(2) 2_546 4_456 ? 
O5 Co4 Ca1 52.25(11) 5_456 1_455 ? 
O5 Co4 Ca1 54.54(9) 8_456 1_455 ? 
O6 Co4 Ca1 123.66(9) . 1_455 ? 
O6 Co4 Ca1 128.21(11) 4_556 1_455 ? 
O4 Co4 Ca1 122.97(5) 4_456 1_455 ? 
O4 Co4 Ca1 60.92(5) 1_455 1_455 ? 
Ca1 Co4 Ca1 116.88(4) . 1_455 ? 
Ca1 Co4 Ca1 179.206(11) 4_556 1_455 ? 
Ca2 Co4 Ca1 73.81(2) 3 1_455 ? 
Ca2 Co4 Ca1 108.63(2) 2_546 1_455 ? 
Ca1 Co4 Ca1 62.33(4) 4_456 1_455 ? 
Co2 O1 Co1 120.76(13) . . ? 
Co2 O1 Ca1 102.04(7) . 6_565 ? 
Co1 O1 Ca1 100.54(7) . 6_565 ? 
Co2 O1 Ca1 102.04(7) . . ? 
Co1 O1 Ca1 100.54(7) . . ? 
Ca1 O1 Ca1 133.30(13) 6_565 . ? 
Co1 O2 Co2 121.92(13) . 1_655 ? 
Co1 O2 Ca2 101.77(7) . 6_565 ? 
Co2 O2 Ca2 100.44(7) 1_655 6_565 ? 
Co1 O2 Ca2 101.77(7) . . ? 
Co2 O2 Ca2 100.44(7) 1_655 . ? 
Ca2 O2 Ca2 133.22(13) 6_565 . ? 
Co2 O3 Co3 146.8(3) . 2_556 ? 
Co2 O3 Ca1 122.2(2) . 3_554 ? 
Co3 O3 Ca1 87.38(17) 2_556 3_554 ? 
Co2 O3 Ca2 108.84(15) . . ? 
Co3 O3 Ca2 81.51(11) 2_556 . ? 
Ca1 O3 Ca2 93.56(13) 3_554 . ? 
Co2 O3 Ca2 86.28(9) . 1_455 ? 
Co3 O3 Ca2 77.23(10) 2_556 1_455 ? 
Ca1 O3 Ca2 91.63(11) 3_554 1_455 ? 
Ca2 O3 Ca2 157.8(2) . 1_455 ? 
Co1 O4 Co4 147.4(3) . 1_655 ? 
Co1 O4 Ca2 122.5(3) . 3_655 ? 
Co4 O4 Ca2 87.50(18) 1_655 3_655 ? 
Co1 O4 Ca1 107.46(16) . 1_655 ? 
Co4 O4 Ca1 81.00(11) 1_655 1_655 ? 
Ca2 O4 Ca1 92.69(13) 3_655 1_655 ? 
Co1 O4 Ca1 87.44(9) . . ? 
Co4 O4 Ca1 77.98(10) 1_655 . ? 
Ca2 O4 Ca1 92.57(13) 3_655 . ? 
Ca1 O4 Ca1 158.1(2) 1_655 . ? 
Co3 O5 Co4 170.99(10) . 5_456 ? 
Co3 O5 Ca2 88.24(18) . 2_546 ? 
Co4 O5 Ca2 96.12(8) 5_456 2_546 ? 
Co3 O5 Ca1 95.95(8) . 5_556 ? 
Co4 O5 Ca1 90.33(18) 5_456 5_556 ? 
Ca2 O5 Ca1 106.92(6) 2_546 5_556 ? 
Co3 O5 Ca1 86.64(7) . 8 ? 
Co4 O5 Ca1 88.07(16) 5_456 8 ? 
Ca2 O5 Ca1 171.60(19) 2_546 8 ? 
Ca1 O5 Ca1 80.26(12) 5_556 8 ? 
Co3 O5 Ca2 87.60(16) . 6_465 ? 
Co4 O5 Ca2 85.42(7) 5_456 6_465 ? 
Ca2 O5 Ca2 79.90(12) 2_546 6_465 ? 
Ca1 O5 Ca2 172.36(18) 5_556 6_465 ? 
Ca1 O5 Ca2 93.23(6) 8 6_465 ? 
Co4 O6 Co3 167.43(10) . . ? 
Co4 O6 Ca1 89.28(18) . . ? 
Co3 O6 Ca1 96.90(8) . . ? 
Co4 O6 Ca2 96.93(8) . 6_465 ? 
Co3 O6 Ca2 91.42(18) . 6_465 ? 
Ca1 O6 Ca2 108.92(6) . 6_465 ? 
Co4 O6 Ca2 86.70(7) . 2_546 ? 
Co3 O6 Ca2 85.26(15) . 2_546 ? 
Ca1 O6 Ca2 169.24(17) . 2_546 ? 
Ca2 O6 Ca2 81.50(13) 6_465 2_546 ? 
Co4 O6 Ca1 84.83(15) . 4_556 ? 
Co3 O6 Ca1 85.34(7) . 4_556 ? 
Ca1 O6 Ca1 81.01(13) . 4_556 ? 
Ca2 O6 Ca1 169.89(16) 6_465 4_556 ? 
Ca2 O6 Ca1 88.68(5) 2_546 4_556 ? 
 
_diffrn_measured_fraction_theta_max    0.997 
_diffrn_reflns_theta_full              31.54 
_diffrn_measured_fraction_theta_full   0.997 
_refine_diff_density_max    0.735 
_refine_diff_density_min   -0.936 
_refine_diff_density_rms    0.167 
